# Supplementary material
Source: PubMed Central journal article supplement (PMC10232272)
Supplement: awad007_supplementary_data.pdf [file awad007_supplementary_data.pdf]

Supplemental materials for

# Quantitative approaches to guide epilepsy surgery from intracranial EEG

John M. Bernabei\*, Adam Li\*, Andrew Y. Revell, Rachel J. Smith, Kristin M. Gunnarsdottir, Ian Z. Ong, Kathryn A. Davis, Nishant Sinha, Sridevi Sarma\*\*, Brian Litt\*\*

Supplementary Table 1:

| DATASET ID         | SUBJECT ID  | AGE | SEX | IMPLANT | THERAPY   | ENGEL OUTCOME | DATA TYPE        | SITE |
|--------------------|-------------|-----|-----|---------|-----------|---------------|------------------|------|
| DS003029           | sub-jh101   | n/a | n/a | ECOG    | Resection | 4             | ictal            | JHU  |
| DS003029           | sub-jh102   | n/a | n/a | ECOG    | Resection | NR            | ictal            | JHU  |
| DS003029, DS003876 | sub-jh103   | n/a | n/a | ECOG    | Resection | 4             | interictal+ictal | JHU  |
| DS003029           | sub-jh104   | n/a | n/a | ECOG    | Resection | NR            | ictal            | JHU  |
| DS003029, DS003876 | sub-jh105   | n/a | n/a | ECOG    | Resection | 1             | interictal+ictal | JHU  |
| DS003029           | sub-jh106   | n/a | n/a | ECOG    | Resection | NR            | ictal            | JHU  |
| DS003029           | sub-jh108   | n/a | n/a | ECOG    | Resection | 4             | ictal            | JHU  |
| DS003029, DS003876 | sub-pt1     | 30  | F   | ECOG    | Resection | 1             | interictal+ictal | NIH  |
| DS003029, DS003876 | sub-pt2     | 28  | F   | ECOG    | Resection | 1             | interictal+ictal | NIH  |
| DS003029, DS003876 | sub-pt3     | 45  | M   | ECOG    | Resection | 1             | interictal+ictal | NIH  |
| DS003029           | sub-pt10    | 44  | F   | ECOG    | Resection | 2             | ictal            | NIH  |
| DS003029           | sub-pt11    | 31  | M   | ECOG    | Resection | 1             | ictal            | NIH  |
| DS003029           | sub-pt12    | 43  | F   | ECOG    | Resection | 2             | ictal            | NIH  |
| DS003029           | sub-pt13    | 27  | M   | ECOG    | Resection | 1             | ictal            | NIH  |
| DS003029           | sub-pt14    | 49  | F   | ECOG    | Resection | 4             | ictal            | NIH  |
| DS003029           | sub-pt15    | 59  | F   | ECOG    | Resection | 1             | ictal            | NIH  |
| DS003029           | sub-pt16    | 52  | F   | ECOG    | Resection | 1             | ictal            | NIH  |
| DS003029           | sub-pt17    | 13  | M   | ECOG    | Resection | 1             | ictal            | NIH  |
| DS003029           | sub-pt6     | 33  | M   | ECOG    | Resection | 2             | ictal            | NIH  |
| DS003029           | sub-pt7     | 39  | F   | ECOG    | Resection | 3             | ictal            | NIH  |
| DS003029           | sub-pt8     | 25  | M   | ECOG    | Resection | 1             | ictal            | NIH  |
| DS003029           | sub-ummc001 | 23  | M   | SEEG    | Resection | NR            | ictal            | UMMC |
| DS003029           | sub-ummc002 | 17  | M   | SEEG    | Resection | 1             | ictal            | UMMC |
| DS003029           | sub-ummc003 | 31  | M   | SEEG    | Resection | 1             | ictal            | UMMC |
| DS003029           | sub-ummc004 | 38  | M   | SEEG    | Resection | 1             | ictal            | UMMC |
| DS003029           | sub-ummc005 | 47  | M   | SEEG    | Resection | 1             | ictal            | UMMC |
| DS003029           | sub-ummc006 | 36  | M   | SEEG    | Resection | 1             | ictal            | UMMC |

|                 |              |     |   |      |           |    |                    |       |
|-----------------|--------------|-----|---|------|-----------|----|--------------------|-------|
| <b>DS003029</b> | sub-ummc007  | 54  | M | SEEG | Resection | NR | ictal              | UMMC  |
| <b>DS003029</b> | sub-ummc008  | 49  | M | SEEG | Resection |    | 1 ictal            | UMMC  |
| <b>DS003029</b> | sub-ummc009  | 36  | M | SEEG | Resection |    | 1 ictal            | UMMC  |
| <b>DS003876</b> | sub-NIH1     | 57  | F | SEEG | Resection |    | 1 interictal       | NIH   |
| <b>DS003876</b> | sub-NIH10    | 25  | M | SEEG | Resection |    | 2 interictal       | NIH   |
| <b>DS003876</b> | sub-NIH11    | 27  | M | SEEG | Resection |    | 2 interictal       | NIH   |
| <b>DS003876</b> | sub-NIH2     | 31  | M | SEEG | Resection |    | 1 interictal       | NIH   |
| <b>DS003876</b> | sub-NIH3     | 36  | F | SEEG | Resection |    | 1 interictal       | NIH   |
| <b>DS003876</b> | sub-NIH4     | 39  | M | SEEG | Resection |    | 1 interictal       | NIH   |
| <b>DS003876</b> | sub-NIH5     | 41  | M | SEEG | Resection |    | 1 interictal       | NIH   |
| <b>DS003876</b> | sub-NIH6     | 20  | F | SEEG | Resection |    | 3 interictal       | NIH   |
| <b>DS003876</b> | sub-NIH7     | 46  | M | SEEG | Resection |    | 3 interictal       | NIH   |
| <b>DS003876</b> | sub-NIH8     | 37  | M | SEEG | Resection |    | 2 interictal       | NIH   |
| <b>DS003876</b> | sub-NIH9     | 16  | F | SEEG | Resection |    | 3 interictal       | NIH   |
| <b>DS003876</b> | sub-PY18N002 | 62  | M | SEEG | Resection |    | 2 interictal       | JHU   |
| <b>DS003876</b> | sub-PY18N007 | 32  | F | SEEG | Resection |    | 4 interictal       | JHU   |
| <b>DS003876</b> | sub-PY18N013 | 24  | F | SEEG | Resection |    | 1 interictal       | JHU   |
| <b>DS003876</b> | sub-PY18N015 | n/a | F | SEEG | Resection |    | 1 interictal       | JHU   |
| <b>DS003876</b> | sub-PY19N012 | 48  | M | SEEG | Resection |    | 2 interictal       | JHU   |
| <b>DS003876</b> | sub-PY19N015 | 23  | F | SEEG | Resection |    | 3 interictal       | JHU   |
| <b>DS003876</b> | sub-PY19N023 | 32  | M | SEEG | Resection |    | 1 interictal       | JHU   |
| <b>DS003876</b> | sub-PY19N026 | 35  | F | SEEG | Resection |    | 1 interictal       | JHU   |
| <b>DS003876</b> | sub-rns002   | 36  | F | SEEG | RNS       |    | 3 interictal       | MIAMI |
| <b>DS003876</b> | sub-rns003   | 21  | M | SEEG | RNS       |    | 3 interictal       | MIAMI |
| <b>DS003876</b> | sub-rns004   | 52  | M | SEEG | RNS       |    | 4 interictal       | MIAMI |
| <b>DS003876</b> | sub-rns005   | 23  | M | SEEG | RNS       |    | 3 interictal       | MIAMI |
| <b>DS003876</b> | sub-rns006   | 49  | M | SEEG | RNS       |    | 1 interictal       | MIAMI |
| <b>DS003876</b> | sub-rns009   | 48  | M | SEEG | RNS       |    | 3 interictal       | MIAMI |
| <b>DS003876</b> | sub-rns011   | 24  | F | SEEG | RNS       |    | 4 interictal       | MIAMI |
| <b>DS003876</b> | sub-rns013   | 25  | M | SEEG | RNS       |    | 2 interictal       | MIAMI |
| <b>DS003876</b> | sub-rns014   | 36  | M | SEEG | RNS       |    | 4 interictal       | MIAMI |
| <b>DS003876</b> | sub-rns015   | 27  | M | SEEG | RNS       |    | 2 interictal       | MIAMI |
| <b>DS003876</b> | sub-umf001   | 37  | F | ECOG | Resection |    | 1 interictal+ictal | UMF   |
| <b>DS003876</b> | sub-umf002   | 39  | F | ECOG | Resection |    | 2 interictal+ictal | UMF   |
| <b>DS003876</b> | sub-umf003   | 43  | M | ECOG | Resection |    | 3 interictal+ictal | UMF   |
| <b>DS003876</b> | sub-umf004   | 23  | F | SEEG | Resection |    | 1 interictal+ictal | UMF   |
| <b>DS003876</b> | sub-umf005   | 32  | F | ECOG | Resection |    | 1 interictal+ictal | UMF   |
| <b>DS004100</b> | sub-HUP060   | 42  | F | SEEG | Ablation  |    | 3 interictal+ictal | HUP   |
| <b>DS004100</b> | sub-HUP064   | 21  | M | ECOG | Resection |    | 1 interictal+ictal | HUP   |
| <b>DS004100</b> | sub-HUP065   | 36  | M | ECOG | Resection |    | 1 interictal+ictal | HUP   |

|                 |             |     |     |      |           |   |                  |     |
|-----------------|-------------|-----|-----|------|-----------|---|------------------|-----|
| <b>DS004100</b> | sub-HUP068  | 33  | M   | ECOG | Resection | 1 | interictal+ictal | HUP |
| <b>DS004100</b> | sub-RID0064 | 25  | F   | ECOG | Resection | 1 | interictal+ictal | HUP |
| <b>DS004100</b> | sub-HUP075  | 57  | F   | ECOG | Resection | 4 | interictal+ictal | HUP |
| <b>DS004100</b> | sub-HUP080  | n/a | F   | ECOG | Resection | 2 | interictal+ictal | HUP |
| <b>DS004100</b> | sub-HUP082  | 56  | F   | ECOG | Resection | 1 | interictal+ictal | HUP |
| <b>DS004100</b> | sub-HUP086  | 25  | F   | ECOG | Resection | 2 | interictal+ictal | HUP |
| <b>DS004100</b> | sub-HUP087  | 24  | M   | ECOG | Resection | 1 | interictal+ictal | HUP |
| <b>DS004100</b> | sub-HUP088  | 35  | F   | ECOG | Resection | 1 | interictal+ictal | HUP |
| <b>DS004100</b> | sub-HUP089  | n/a | n/a | ECOG | Resection | 1 | interictal+ictal | HUP |
| <b>DS004100</b> | sub-HUP094  | 48  | F   | ECOG | Resection | 1 | interictal+ictal | HUP |
| <b>DS004100</b> | sub-HUP097  | n/a | n/a | ECOG | Resection | 1 | interictal+ictal | HUP |
| <b>DS004100</b> | sub-HUP105  | 39  | M   | ECOG | Resection | 1 | interictal+ictal | HUP |
| <b>DS004100</b> | sub-HUP106  | 45  | F   | ECOG | Resection | 1 | interictal+ictal | HUP |
| <b>DS004100</b> | sub-HUP107  | 36  | M   | ECOG | Resection | 1 | interictal+ictal | HUP |
| <b>DS004100</b> | sub-HUP111  | 40  | F   | ECOG | Resection | 1 | interictal+ictal | HUP |
| <b>DS004100</b> | sub-HUP112  | 21  | F   | SEEG | Ablation  | 3 | interictal+ictal | HUP |
| <b>DS004100</b> | sub-HUP114  | n/a | n/a | ECOG | Ablation  | 3 | interictal+ictal | HUP |
| <b>DS004100</b> | sub-HUP116  | 59  | F   | SEEG | Ablation  | 1 | interictal+ictal | HUP |
| <b>DS004100</b> | sub-HUP117  | 39  | M   | SEEG | Resection | 1 | interictal+ictal | HUP |
| <b>DS004100</b> | sub-HUP123  | n/a | n/a | ECOG | Resection | 1 | interictal+ictal | HUP |
| <b>DS004100</b> | sub-HUP126  | n/a | n/a | ECOG | Ablation  | 1 | interictal+ictal | HUP |
| <b>DS004100</b> | sub-HUP130  | 46  | F   | SEEG | Ablation  | 1 | interictal+ictal | HUP |
| <b>DS004100</b> | sub-HUP132  | n/a | n/a | SEEG | Ablation  | 3 | interictal+ictal | HUP |
| <b>DS004100</b> | sub-HUP133  | 52  | F   | SEEG | Ablation  | 3 | interictal+ictal | HUP |
| <b>DS004100</b> | sub-HUP134  | n/a | n/a | SEEG | Resection | 1 | interictal+ictal | HUP |
| <b>DS004100</b> | sub-HUP135  | 37  | M   | SEEG | Ablation  | 2 | interictal+ictal | HUP |
| <b>DS004100</b> | sub-HUP138  | 38  | M   | SEEG | Ablation  | 4 | interictal+ictal | HUP |
| <b>DS004100</b> | sub-HUP139  | 20  | M   | SEEG | Ablation  | 1 | interictal+ictal | HUP |
| <b>DS004100</b> | sub-HUP140  | 47  | F   | SEEG | Ablation  | 1 | interictal+ictal | HUP |
| <b>DS004100</b> | sub-HUP141  | 30  | M   | SEEG | Ablation  | 1 | interictal+ictal | HUP |
| <b>DS004100</b> | sub-HUP142  | n/a | n/a | SEEG | Ablation  | 1 | interictal+ictal | HUP |
| <b>DS004100</b> | sub-HUP144  | n/a | n/a | SEEG | Resection | 1 | interictal+ictal | HUP |
| <b>DS004100</b> | sub-HUP146  | n/a | n/a | SEEG | Resection | 1 | interictal+ictal | HUP |
| <b>DS004100</b> | sub-HUP148  | n/a | n/a | SEEG | Ablation  | 1 | interictal+ictal | HUP |
| <b>DS004100</b> | sub-HUP150  | 17  | M   | SEEG | Ablation  | 1 | interictal+ictal | HUP |
| <b>DS004100</b> | sub-HUP151  | n/a | M   | SEEG | Ablation  | 2 | interictal+ictal | HUP |
| <b>DS004100</b> | sub-HUP157  | 25  | M   | SEEG | Ablation  | 1 | interictal+ictal | HUP |
| <b>DS004100</b> | sub-HUP158  | 32  | M   | SEEG | Ablation  | 2 | interictal+ictal | HUP |
| <b>DS004100</b> | sub-HUP160  | n/a | n/a | SEEG | Resection | 1 | interictal+ictal | HUP |
| <b>DS004100</b> | sub-HUP162  | n/a | n/a | SEEG | Ablation  | 3 | interictal+ictal | HUP |

|                 |            |     |     |      |           |   |                  |     |
|-----------------|------------|-----|-----|------|-----------|---|------------------|-----|
| <b>DS004100</b> | sub-HUP163 | 42  | F   | SEEG | Ablation  | 1 | interictal+ictal | HUP |
| <b>DS004100</b> | sub-HUP164 | 34  | F   | SEEG | Ablation  | 1 | interictal+ictal | HUP |
| <b>DS004100</b> | sub-HUP165 | 21  | F   | SEEG | Ablation  | 2 | interictal+ictal | HUP |
| <b>DS004100</b> | sub-HUP166 | n/a | n/a | SEEG | Resection | 3 | interictal+ictal | HUP |
| <b>DS004100</b> | sub-HUP171 | 50  | M   | SEEG | Ablation  | 2 | interictal+ictal | HUP |
| <b>DS004100</b> | sub-HUP172 | 28  | F   | SEEG | Ablation  | 2 | interictal+ictal | HUP |
| <b>DS004100</b> | sub-HUP173 | 24  | F   | SEEG | Resection | 1 | interictal+ictal | HUP |
| <b>DS004100</b> | sub-HUP177 | 42  | F   | SEEG | Resection | 1 | interictal+ictal | HUP |
| <b>DS004100</b> | sub-HUP179 | 20  | F   | SEEG | Resection | 3 | interictal+ictal | HUP |
| <b>DS004100</b> | sub-HUP180 | 28  | F   | SEEG | Ablation  | 1 | interictal+ictal | HUP |
| <b>DS004100</b> | sub-HUP181 | 31  | F   | SEEG | Ablation  | 3 | interictal+ictal | HUP |
| <b>DS004100</b> | sub-HUP185 | 38  | M   | SEEG | Ablation  | 1 | interictal+ictal | HUP |
| <b>DS004100</b> | sub-HUP187 | n/a | n/a | SEEG | Ablation  | 2 | interictal+ictal | HUP |
| <b>DS004100</b> | sub-HUP188 | 24  | F   | SEEG | Resection | 3 | interictal+ictal | HUP |
| <b>DS004100</b> | sub-HUP190 | 25  | M   | SEEG | Resection | 3 | interictal+ictal | HUP |

Supplementary Table 1: Aggregate patient metadata from 122 subjects. Column 1: Dataset ID of open source data on OpenNeuro.org. Column 2: Subject name. Column 3: Age. Column 4: Sex. Column 5: Implant type – Electrocorticography (ECoG) vs Stereo EEG (SEEG). Column 6: Surgery type: Resection, Ablation, No Surgery, or Responsive Neurostimulation (RNS). Column 7: Engel outcome scale. Column 8: Type of data (interictal only, ictal only, or both). Column 9: Site of acquisition. HUP = Hospital of the University of Pennsylvania. JHU = Johns Hopkins University. NIH = National Institutes for Health Clinical Center. UMF = University of Miami. UMMC = University of Maryland Medical Center.
